# Supplementary material for: Cryo-EM Determination of Eravacycline-Bound Structures of the Ribosome and the Multidrug Efflux Pump AdeJ of Acinetobacter baumannii
Source: PubMed Central journal article supplement (PMC8263017; doi:10.1128/mbio.01031-21), 2021-05-28
Supplement: mbio.01031-21-st001.pdf [file mbio.01031-21-st001.pdf]

**Table S1. AdeJ cryo-EM data collection and refinement statistics.**

| <b>Data collection</b>                        |                 |                 |
|-----------------------------------------------|-----------------|-----------------|
| Magnification                                 | 81,000          |                 |
| Voltage (kV)                                  | 300             |                 |
| Electron Microscope                           | Krios-GIF-K3    |                 |
| Defocus (um)                                  | -1.0 to -2.5    |                 |
| Total exposure time (s)                       | 2               |                 |
| Energy filter width (eV)                      | 20              |                 |
| Pixel size (Å)                                | 1.08 (0.54)     |                 |
| Total dose (e <sup>-</sup> / Å <sup>2</sup> ) | 36              |                 |
| Number of frames                              | 40              |                 |
| Number of micrographs                         | 3,023           |                 |
| Initial particle images (no.)                 | 2,665,397       |                 |
| <b>Refinement</b>                             | <b>Apo-AdeJ</b> | <b>AdeJ-Era</b> |
| Total Particles (no.)                         | 83,768          | 95,451          |
| Symmetry                                      | C1              | C1              |
| GS-FSC <sup>a</sup> Resolution (0.143, Å)     | 2.87            | 2.86            |
| <b>Model composition</b>                      |                 |                 |
| Protein residues                              | 3,142           | 3,142           |
| Ligands                                       | 8               | 9               |
| <b>r.m.s.d.</b>                               |                 |                 |
| Bond lengths (Å)                              | 0.010           | 0.011           |
| Bond angles (°)                               | 0.996           | 1.074           |
| <b>Validation</b>                             | <b>Apo-AdeJ</b> | <b>AdeJ-Era</b> |
| MolProbity score                              | 1.70            | 1.70            |
| Clash score                                   | 5.37            | 5.82            |
| <b>Ramachandran plot</b>                      |                 |                 |
| Favored (%)                                   | 97.54           | 97.10           |
| Allowed (%)                                   | 2.39            | 2.87            |
| Disallowed (%)                                | 0.06            | 0.03            |
| CC <sup>b</sup> Mask                          | 0.72            | 0.72            |

<sup>a</sup>Gold-Standard Fourier Shell Correlation<sup>b</sup>Correlation Coefficient
