# Supplementary material for: Cryo-EM Determination of Eravacycline-Bound Structures of the Ribosome and the Multidrug Efflux Pump AdeJ of Acinetobacter baumannii
Source: PubMed Central journal article supplement (PMC8263017; doi:10.1128/mbio.01031-21), 2021-05-28
Supplement: mbio.01031-21-st002.pdf [file mbio.01031-21-st002.pdf]

**Table S2. Classification of AdeJ protomer states.**

| Protomer    | Cleft State | Exit site distance, Q125 to Y759 | Hydrogen-bonded distance, K952 to |          |          |          | Protomer Assignment |
|-------------|-------------|----------------------------------|-----------------------------------|----------|----------|----------|---------------------|
|             |             |                                  | D407 (Å)                          | D408 (Å) | N953 (Å) | T989 (Å) |                     |
| AdeJ-Apo, A | Closed      | 9.3                              |                                   | -        | 2.9      | -        | Resting             |
| AdeB-Apo, B | Open        | 8.5                              | -                                 | 2.9      | -        | -        | Binding             |
| AdeB-Apo, C | Closed      | 13.7                             | -                                 | -        | 3.0      | 3.1      | Extrusion           |
| AdeB-Era, A | Open        | 9.2                              | 3.1                               | -        | -        | -        | Access              |
| AdeB-Era, B | Open        | 8.5                              | 3.1                               | 2.6      | -        | -        | Binding             |
| AdeB-Era, C | Closed      | 13.8                             | -                                 | -        | 3.2      | -        | Extrusion           |

AdeJ protomers were defined using three criteria; state of the periplasmic cleft (open or closed), measurement of the exit site (distance between C $\alpha$  atoms of Q125 and Y759) and hydrogen bond distances of the PTC (K952 to D407, D408, N953 and T989). Using these results, protomers were assigned as either resting, access, binding and extrusion.
