# Supplementary material for: Cryo-EM Determination of Eravacycline-Bound Structures of the Ribosome and the Multidrug Efflux Pump AdeJ of Acinetobacter baumannii
Source: PubMed Central journal article supplement (PMC8263017; doi:10.1128/mbio.01031-21), 2021-05-28
Supplement: mbio.01031-21-st003.pdf [file mbio.01031-21-st003.pdf]

**Table S3. Ribosome cryo-EM data collection and refinement statistics.**

| <b>Data collection</b>                          |               |            |                        |                        |                  |                      |
|-------------------------------------------------|---------------|------------|------------------------|------------------------|------------------|----------------------|
| Magnification                                   | 105,000       |            |                        |                        |                  |                      |
| Voltage (kV)                                    | 300           |            |                        |                        |                  |                      |
| Electron Microscope                             | Krios-GIF-K3  |            |                        |                        |                  |                      |
| Defocus (um)                                    | -1.0 to -2.5  |            |                        |                        |                  |                      |
| Total exposure time (s)                         | 1.2           |            |                        |                        |                  |                      |
| Energy filter width (eV)                        | 20            |            |                        |                        |                  |                      |
| Pixel size (Å)                                  | 0.848 (0.424) |            |                        |                        |                  |                      |
| Total dose (e <sup>-</sup> / Å <sup>2</sup> )   | 46            |            |                        |                        |                  |                      |
| Number of frames                                | 46            |            |                        |                        |                  |                      |
| Number of micrographs                           | 3,217         |            |                        |                        |                  |                      |
| Initial particle images (no.)                   | 813,709       |            |                        |                        |                  |                      |
| Final particle images (no.)                     | 404,703       |            |                        |                        |                  |                      |
| <b>Refinement</b>                               | <b>30S</b>    | <b>50S</b> | <b>70S P-site-tRNA</b> | <b>70S E-site-tRNA</b> | <b>70S Empty</b> | <b>70S hpf-bound</b> |
| Total Particles (no.)                           | 47,367        | 92,112     | 40,679                 | 109,599                | 79,574           | 11,390               |
| <u>GS-FSC Resolution (0.143, Å)<sup>a</sup></u> |               |            |                        |                        |                  |                      |
| 50S                                             | -             | 2.54       | 2.66                   | 2.50                   | 2.55             | 2.92                 |
| 30S Core                                        | 2.80          | -          | 2.78                   | 2.66                   | 2.73             | 3.05                 |
| 30S Head                                        | 2.71          | -          | 2.75                   | 2.63                   | 2.69             | 3.04                 |
| <u>Model composition</u>                        |               |            |                        |                        |                  |                      |
| Chains                                          | 21            | 30         | 53                     | 53                     | 51               | 52                   |
| Protein residues                                | 2,386         | 3,128      | 5,528                  | 5,511                  | 5,518            | 5,625                |
| Nucleotides                                     | 1,528         | 2,847      | 4,453                  | 4,453                  | 4,373            | 4,373                |
| Mg <sup>2+</sup>                                | 83            | 159        | 190                    | 196                    | 191              | 187                  |
| Waters                                          | 191           | 802        | 552                    | 1044                   | 797              | 229                  |
| Era                                             | 1             | 2          | 3                      | 3                      | 3                | 2                    |
| <u>r.m.s.d.</u>                                 |               |            |                        |                        |                  |                      |
| Bond lengths (Å)                                | 0.003         | 0.002      | 0.002                  | 0.002                  | 0.002            | 0.002                |
| Bond angles (°)                                 | 0.538         | 0.518      | 0.501                  | 0.535                  | 0.505            | 0.507                |
| <b>Validation</b>                               | <b>30S</b>    | <b>50S</b> | <b>70S P-site-tRNA</b> | <b>70S E-site-tRNA</b> | <b>70S Empty</b> | <b>70S hpf-bound</b> |
| MolProbity score                                | 1.43          | 1.17       | 1.27                   | 1.51                   | 1.27             | 1.42                 |
| Clash score                                     | 4.30          | 2.88       | 3.61                   | 3.39                   | 3.05             | 4.56                 |
| <u>Ramachandran plot</u>                        |               |            |                        |                        |                  |                      |
| Favored (%)                                     | 96.63         | 97.56      | 97.37                  | 97.34                  | 96.97            | 96.85                |
| Allowed (%)                                     | 3.15          | 2.28       | 2.52                   | 2.49                   | 2.82             | 2.99                 |
| Disallowed (%)                                  | 0.21          | 0.16       | 0.11                   | 0.17                   | 0.20             | 0.16                 |
| CC Mask                                         | 0.75          | 0.79       | 0.72                   | 0.72                   | 0.73             | 0.71                 |

<sup>a</sup>Gold-Standard Fourier Shell Correlation; refinements split into three regions for each structure.
